# Supplementary material
Source: Springer Nature journal article supplement (https://www.springermedizin.de/resource/supplementary/12889_2014_7155_MOESM4_ESM.docx/9496968)
Supplement: MOESM4 [file 9496968]

| No of issues | | 11 |
| --- | --- | --- |
| Total number of pages | | 2165 |
| Number of references | | 750 |
| Median number of advice pages in an issue | | 35 |
| No of references to: | |  |
| Muscularity and Leanness | 516 |
| Weight control | 234 |
| Dietary advice | | 162 pages (7% of content) |
